# Supplementary material for: Using atmospheric observations to quantify annual biogenic carbon dioxide fluxes on the Alaska North Slope
Source: Copernicus journal article supplement (doi:10.5194/bg-2022-167), 2022-08-29
Supplement: Supplementary file [file bg-2022-167-AC1-supplement.pdf]

## RC1

### Review of “Using atmospheric observations to quantify annual biogenic carbon dioxide fluxes on the Alaska North Slope” by Schiferl et al. (2022)

The manuscript by Schiferl et al. (2022) integrates atmospheric and ground in situ observations, remote-sensing data, and the Tundra Vegetation Photosynthesis and Respiration Model (TVPRM) ensemble, which was developed in this study, to quantify the annual net biospheric carbon dioxide (CO<sub>2</sub>) flux and seasonality from the North Slope of Alaska. Using observations to optimize TVPRM predictions, it was determined that the North Slope is a near-neutral flux of CO<sub>2</sub> (ranging between -6 to +6 TgC yr<sup>-1</sup>). The interannual variability of the net CO<sub>2</sub> flux from this region varied between a small source and sink of carbon to the atmosphere and is driven by yearly differences in the strength of the CO<sub>2</sub> uptake growing season. The non-growing season is shown to be a large source of CO<sub>2</sub> to the atmosphere driven by soil respiration and inland aquatic systems during the early cold season which counteracts the carbon sink during the summer months. However, this work did not find the large late cold season CO<sub>2</sub> respiration in this region that has been identified in other recent studies. This work demonstrates that there are numerous uncertainties in the capability to upscale observations to regional-scale net CO<sub>2</sub> flux estimates and suggests that higher spatiotemporal observation coverage is needed to improve the accuracy of net CO<sub>2</sub> flux estimates from the North Slope in the present and the future.

The study by Schiferl et al. (2022) applies an impressive amount of data sets to derive net CO<sub>2</sub> flux estimates for the North Slope between 2012 and 2017. The TVPRM predictions are optimized using atmospheric CO<sub>2</sub> measurements and an atmospheric transport model and the TVPRM predictions are compared to other estimates for this region. These aspects and the comprehensive evaluation of TVPRM predictions are impressive aspects of the study. However, the text itself is challenging to follow in multiple parts of the manuscript and could be improved with some rewriting. There are a large number of figures (which themselves have numerous subpanels/legends and dense figure captions) and tables in the main body of the manuscript and the supplemental information section which the authors bounce back and forth between throughout the paper. The manuscript presentation and readability could be improved by some reorganization and simplification. Furthermore, I feel that the paper lacks discussion about the novel aspects of the work and how it advances the scientific understanding of the field. These issues, along with some potential issues with the methods and interpretations of the results of this study, are described further below. With some major revisions and improvements in the writing of the text, I think this paper could be published in Biogeosciences.

We thank the reviewer for their thorough and helpful comments and suggestions. We have done our best to balance the requests for additional information and details while also keeping the paper from becoming additionally complicated. Specific responses to each comment follow in red, with proposed edits to the manuscript in blue. Line numbers refer to the original manuscript.

## Major Comments

1. More attention and details in the text are needed when describing how TPVRM variable parameters are derived. Text S1 should be expanded and potentially placed in the main text of the manuscript. First off, statistics on the correlation between observed values of CO<sub>2</sub> flux and T<sub>s</sub>/T<sub>a</sub> to the  $\alpha_s/\alpha_a$  and  $\beta_s/\beta_a$  fitting parameters should be presented in the text of Step 1 and Step 2, respectively. Same thing for the non-linear fits derived in Step 3. Secondly, median observed net CO<sub>2</sub> fluxes are used for the linear fits in Step 1 and 2; however, the instantaneous 30-min observed net CO<sub>2</sub> flux data are used in Step 3. Why are the observed CO<sub>2</sub> values treated differently in these steps? Also, are the median values for Step 1 and 2 determined for the entire 365 day moving window? Finally, many constants are presented (e.g., PAR<sub>0</sub>, initial  $\lambda$ , % of potential growing and non-growing days needed, % of half-hourly CO<sub>2</sub> observations that are negative, etc.) throughout Text S1 that have no references or justification/explanation of why they were chosen. These mentioned aspects, and any others the authors think could improve the description of how TVPRM fits are derived, need to be expanded upon in the revised manuscript.

As the reviewer points out the existing complexity of the paper, we choose to keep the details of the procedure for deriving the TVPRM variable parameters in Sect. S1 of the Supplement. The main components of the procedure (linear regression to determine respiration components, non-linear regression to determine GPP components) largely follow that of the previous iteration of this empirical CO<sub>2</sub> flux model, PVPRM-SIF, in Luus et al., (2017). However, instead of using snow cover as the indicator of T<sub>a</sub>-driven respiration (no snow) or T<sub>s</sub>-driven respiration (snow), we separate respiration into R<sub>soil</sub> and R<sub>plant</sub> components, which explicitly represent heterotrophic and autotrophic respiration communities, respectively. R<sub>soil</sub> is now applied year-round, with R<sub>plant</sub> applied during the growing season as determined by SIF. This change also simplifies the required model inputs to only reanalysis data and SIF.

Given that we determine the parameters for each site using a moving-window approach, it is impractical to present all the statistics for each of these fits (N = 7132). Instead, we present the statistics on the site-level observation/simulation comparison for net CO<sub>2</sub> flux using the median parameters (used later to scale to the regional domain) in Fig. S4, which are more representative of the ultimate performance of the model. The results of this comparison are described in Sect. S4. We now point to this comparison toward the end of Sect. S1.

For step 1, we use daily mean T<sub>s</sub> and daily mean observed net CO<sub>2</sub> flux (Supplement line 16) to account for the lack of variability in input T<sub>s</sub> from reanalysis products on sub-daily timescales. For steps 2 and 3, we use half-hourly T<sub>a</sub> and PAR and the corresponding half-hourly observed net CO<sub>2</sub> flux (Supplement lines 20, 24-25, respectively) as these variables have considerable diurnal variability. The “median observed net CO<sub>2</sub> flux” mentioned in steps 1 and 2 refers to the results of the 5% binning employed prior to the regression calculation for that 365-day window. This binning by ordered T<sub>s</sub> and T<sub>a</sub> (and their corresponding observed net CO<sub>2</sub> flux) in each step more evenly distributes the influence of high- and low-end values in the regression. For T<sub>s</sub>, the distribution of values is non-normal, with a majority of points just below 0°C during the long zero-curtain period. For T<sub>a</sub>, the distribution of values is sporadic and variable as data from the light-limited growing season is limited to August and the number of total points available is only ~10% of those used in the R<sub>soil</sub> fit.

We have clarified steps 1 and 2 in Sect. S1 to read as follows:

“Step 1: *Linear regression of observed net CO<sub>2</sub> flux against soil temperature (T<sub>s</sub>) during non-growing season to determine  $\alpha_s$  and  $\beta_s$  and calculate soil respiration (R<sub>soil</sub>).* Daily mean T<sub>s</sub> and the corresponding daily mean observed net CO<sub>2</sub> flux during potential non-growing days (daily maximum air temperature (T<sub>a</sub>) < 0°C) when SIF = 0 and 50% of the half-hours have observed net CO<sub>2</sub> flux are identified and sorted into 5% bins by ordering the daily mean T<sub>s</sub>. Regression is performed on the 20 median observed net CO<sub>2</sub> flux and T<sub>s</sub> values calculated from these bins. Daily values are used here to account for the lack of variability in T<sub>s</sub> from reanalysis products on sub-daily timescales. The binning approach distributes the influence of low-end T<sub>s</sub> values more evenly in the regression, which is needed because the distribution of T<sub>s</sub> values is non-normal, with a majority of points just below 0°C during the long zero-curtain period.”

“Step 2: *Linear regression of observed net CO<sub>2</sub> flux against T<sub>a</sub> during growing-season night to determine  $\alpha_a$  and  $\beta_a$  and calculate plant respiration (R<sub>plant</sub>).* Half-hourly T<sub>a</sub> and the corresponding half-hourly observed net CO<sub>2</sub> flux with R<sub>soil</sub> (calculated in step 1) removed during potential growing days (daily minimum T<sub>a</sub> > 0°C) when solar-induced chlorophyll fluorescence (SIF) > 0 and photosynthetically active radiation (PAR) ≤ 4 μmol photon m<sup>-2</sup> s<sup>-1</sup> are identified and sorted into 5% bins by ordering the half-hourly T<sub>a</sub>. Regression is performed on the 20 median observed net CO<sub>2</sub> flux with R<sub>soil</sub> removed and T<sub>a</sub> values calculated from these bins. The binning approach distributes the influence of T<sub>a</sub> values more evenly in the regression, which is needed because distribution of values is sporadic and variable as data from the light-limited growing season is limited to August and the number of total points available is only ~10% of those used in the R<sub>soil</sub> fit.”

The initial values used for the nls in step 3 (PAR0 = 240 and λ = 0.04) come from the shrub tundra parameters reported by Luus et al. (2017). Other criteria such as % of potential growing and non-growing days needed, % of half-hourly CO<sub>2</sub> observations that are negative were chosen to balance maintaining representativeness of the fit (i.e., having data from throughout the entire time period) and keeping enough data to be useful for a stable fit (i.e., non-growing season data is more limited). The criteria for the TPVRM model data filtering and tuning described here also results in the best version of the model compared to observations after many iterations and rounds of testing.

We have added the following to the end of Sect. S1 to clarify several of the above points:

“The main components of the procedures for steps 1-3 above (i.e., linear regressions for respiration, non-linear regression for GPP) largely follow that of the previous version of this empirical CO<sub>2</sub> flux model described by Luus et al., (2017). However, instead of using snow cover as the indicator of T<sub>a</sub>-driven total respiration (no snow) or T<sub>s</sub>-driven total respiration (snow), as in Luus et al., (2017), we separate respiration into R<sub>soil</sub> and R<sub>plant</sub> components, which explicitly represent heterotrophic and autotrophic respiration communities, respectively. R<sub>soil</sub> is now applied year-round, with R<sub>plant</sub> applied during the growing season as determined by SIF. This change also simplifies the required model inputs to only reanalysis data and SIF.

The threshold criteria described above for performing a regression calculation during a particular window and for filtering data used in the regressions were chosen to balance maintaining representativeness of the various regressions (i.e., data is available from throughout the entire time period) and keeping enough data to be useful for a stable fit (i.e., non-growing season data is more limited). The methods for determining the TPVRM parameters described

here also result in the best version of the model compared to observations after many development iterations.”

2. How are CO<sub>2</sub> fluxes from sources other than the terrestrial biosphere accounted for in observations of CO<sub>2</sub> enhancements ( $\Delta$ CO<sub>2</sub>)? The tall-tower and aircraft measurements observe total CO<sub>2</sub> from all flux sources including regional fossil fuel usage, waste burning, shipping, or small fires not removed “by elevated or varying carbon monoxide (CO) concentrations”. Exactly how CO was used for the purpose of removing the influence of wildfires needs to be better explained. Overall, if  $\Delta$ CO<sub>2</sub> from all the other sources of CO<sub>2</sub> in this region are not removed from the observations, the comparison between them and simulated values will be biased for incorrect reasons. This needs to be better described in the text.

In addition to the biosphere, other potential sources of CO<sub>2</sub> on the Alaska North Slope include biomass burning and anthropogenic activity. Together, these other sources are small and regionally contribute less than 1 TgC to the atmosphere for our study period, according to EDGAR anthropogenic and GFED biomass burning inventories (see below). Biomass burning is highly variable from year to year. Even during high fire years for the entirety of Alaska, such as 2015, there has been little fire activity on the North Slope.

The following was added to the Supplement as Table S1:

Table S1. Annual and seasonal CO<sub>2</sub> emission totals from anthropogenic and biomass burning sources and area burned in the Alaska North Slope and all of Alaska for 2012–2017. Annual anthropogenic emissions are from EDGAR, the Emissions Database for Global Atmospheric Research v7.0 ([https://edgar.jrc.ec.europa.eu/dataset\\_ghg70](https://edgar.jrc.ec.europa.eu/dataset_ghg70)). Monthly biomass burning emissions are from GFED, Global Fire Emissions Database v4 (<https://globalfiredata.org/pages/data/#emissions>). Area burned data is from the Alaska Interagency Coordination Center via UAF SNAP tool (<https://snap.uaf.edu/tools/daily-fire-tally>).

|                                                 | Domain      | 2012 | 2013 | 2014 | 2015 | 2016 | 2017 | Jun-Sep 2015 | May-Nov 2017 |
|-------------------------------------------------|-------------|------|------|------|------|------|------|--------------|--------------|
| Anthropogenic CO <sub>2</sub> Emissions [TgC]   | North Slope | 0.73 | 0.74 | 0.78 | 0.82 | 0.77 | 0.79 |              |              |
|                                                 | Alaska      | 7.7  | 7.7  | 7.8  | 8.2  | 8.3  | 8.4  |              |              |
| Biomass Burning CO <sub>2</sub> Emissions [TgC] | North Slope | 0.23 | 0.12 | 0.00 | 0.12 | 0.34 | 0.07 | 0.12         | 0.07         |
|                                                 | Alaska      | 0.97 | 6.7  | 1.7  | 28   | 1.9  | 7.6  | 28           | 7.6          |
| Area Burned [million acres]                     | Alaska      |      | 1.3  |      | 5.1  | 0.50 | 0.65 | 5.1          | 0.65         |

We note that area burned values for 2012 and 2014 data were not available but are lower than 2016 in the figure reference the reviewer at <https://uaf-iarc.org/alaskas-changing-wildfire-environment/>.

Domains used in above quantification:

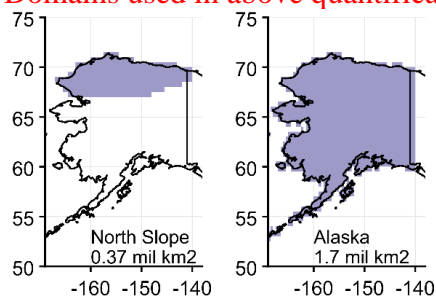

As the reviewer notes, to avoid comparing our model to atmospheric observations of non-biogenic sources, we remove observational time periods from our analysis whenever “indicated by elevated or varying carbon monoxide (CO) concentrations” (line 122). More specifically, CO<sub>2</sub> data with corresponding CO concentrations greater than 150 ppb are removed as in Chang et al. (2014) and Commane et al. (2017), which indicates a strong local combustion source. Observational time periods with variable CO concentrations, as indicated by 40 ppb change throughout a profile or horizontal transit, which may not meet the 150 ppb threshold, indicate complex mixing of more remote combustion sources and are also removed from the analysis (Chang et al., 2014).

We have clarified the description of the CO-filtering and expectations of observing combustion CO<sub>2</sub> fluxes on the North Slope in Sect. 2.1.1 to read as follows:

“For the ARM-ACME V and ABoVE Arctic-CAP aircraft campaign observations, we group averaged sampling points into 50 m vertical bins after removing data influenced by combustion sources such as anthropogenic activity and biomass burning events. These combustion sources of CO<sub>2</sub> are expected to be small (<1 TgC yr<sup>-1</sup> on the North Slope, see Table S1) during our study period. They are not accounted for in biogenic CO<sub>2</sub> flux models, however, and must be removed from our analysis when observed. We remove time periods with elevated carbon monoxide (CO) concentration above 150 ppb, as in Chang et al. (2014) and Commane et al. (2017), which indicates local combustion sources. Time periods with highly variable CO concentrations ( $\Delta\text{CO} > 40$  ppb) indicate complex mixing of more remote combustion sources and are also removed (Chang et al., 2014).”

3. The organization of the paper made it a challenge to read. For instance, Fig. 2 “Constrained” TVPRM predictions are shown here in the results. It was not easy to follow what the constrained TVPRM values were. Reading further, much past where Fig. 2 is discussed, I see on Line 345 this explanation is provided. It would be best if the discussion of the model performance and clearer description of how the “best” model ensemble members were determined is needed in the methods section (before results are being discussed). Furthermore, ZC and IW are finally described in Sect 3.4 after being introduced well after they are being shown in the results. This made interpreting a large portion of the paper very difficult.

The use of the atmospheric observations to constrain the TVPRM ensemble is a key result of the paper and would not be appropriate for the methods.

We have made the following changes to improve clarity of the paper organization and Fig. 2:

Added clarifications throughout the final paragraph of Sect. 2.5 to outline the organization of the results to better streamline the flow for the reader, now mentioning upcoming terminology (TVPRM Unconstrained, Constrained, ZC and IW) and the corresponding sections which describe them.

This paragraph now reads:

“These comparisons enable us to constrain the regional net CO<sub>2</sub> flux on the Alaska North Slope. First, we identify the year-round empirically driven net CO<sub>2</sub> fluxes from the TVPRM ensemble (TVPRM Unconstrained) which are most consistent with the CO<sub>2</sub> concentration observations from the two aircraft campaigns and at the tower (TVPRM Constrained) (Sects. 3.1–3.2). Then, noting the large range in potential cold season CO<sub>2</sub> fluxes, we compare our constrained TVPRM member with CO<sub>2</sub> fluxes from previous studies (Sect. 3.3). Finally, we suggest and quantify sources of the missing CO<sub>2</sub> flux observed during the early cold season (defined here as September–December) and incorporate those fluxes into our net CO<sub>2</sub> budget (TVPRM Constrained + Additional Zero Curtain Emissions (ZC) and Inland Water Fluxes (IW)) (Sect. 3.4). This analysis provides a unique regional net CO<sub>2</sub> flux quantification for the North Slope that is verified using atmospheric observations and can also be explained from an ecological and physical perspective.”

It will only further complicate the paper to separate the figures into unconstrained and constrained versions, so we have added pointers in the Fig. 2 caption to clarify that the black points represent values from the constrained TVPRM with ZC and IW and that the description of this scenario comes later in the paper.

The caption now reads:

“Aircraft and tower CO<sub>2</sub> concentration measurements constrain year-round simulated CO<sub>2</sub> fluxes on the Alaska North Slope. **(a)–(c)** Comparison of observed and simulated  $\Delta$ CO<sub>2</sub> during the ARM-ACME V flight campaign **(a)**, during the ABoVE Arctic-CAP flight campaign **(b)**, and at the NOAA BRW tower **(c)** for air over the Alaska North Slope. Horizontal lines indicate range of uncertainty in the NOAA BRW tower ocean sector background calculation. Vertical boxes colored by month of the year represent 50% and whiskers represent 95% of  $\Delta$ CO<sub>2</sub> values from all members of unconstrained TVPRM ensemble (see Sect. 2.4) from all binned points. Black points show values from the constrained TVPRM member with additional zero-curtain emissions (ZC) and inland water fluxes (IW) (see Sect. 3.4). For **(a)–(b)**, observed values are vertically binned medians, and for constrained TVPRM member + ZC and IW, vertical lines contain middle 95% of  $\Delta$ CO<sub>2</sub> values from all binned points. **(d)** Combined comparison of observed and simulated  $\Delta$ CO<sub>2</sub> for all aircraft and tower points using constrained TVPRM member + ZC and IW. Shown with linear best fit (red line), slope determined by ordinary least squares, and coefficient of determination ( $R^2$ ) of all points ( $n = 455$ ). 1:1 line shown in dark gray.”

This brings up a larger point. The paper itself is very dense when including the supplementary material which includes 18 additional figures all of which include numerous sub-panels. The text jumps between supplementary figures and the main text very frequently which makes interpreting the work difficult. Is there a way to reorganize the text and potentially reduce the number of figures (all of which have many different panels, titles, legends, and very dense captions) and tables to streamline the study?

Based on the above suggestions, we have strived to make the main text and science discussion as streamlined as possible given the numerous datasets and methods included in this study. The main text is structured straightforwardly with only five figures that focus on the atmospheric observations and quantifying the net CO<sub>2</sub> flux. The extensive supplementary material included is necessary to provide additional information to those interested in the topic who may find worth in the extra time it takes to distill those details, therefore we have not reduced the content of the Supplement.

4. Accuracy of Weather Research and Forecasting (WRF) meteorology over the North Slope and BRW tower. This is an aspect which is not discussed in the study and could potentially be very important for the results and interpretation of this work. How well does WRF capture the winds (speed and direction) over the region and at BRW? How about planetary boundary layer (PBL) dynamics in this region? Are there meteorological stations, or aircraft observations, which could be used to assess the WRF winds and PBL prediction accuracy? Biased WRF simulations will bias the comparison of observed and simulated  $\Delta\text{CO}_2$  values. This could be one of the main reasons why TVPRM in this study, and other past net CO<sub>2</sub> flux estimate products do not capture the magnitudes and seasonality of  $\Delta\text{CO}_2$  at BRW. This tower is located on the coast, and it is possible that the model is not performing well in this location. I don't think this paper can be published without providing some demonstration about the accuracy of the WRF meteorology used in this study.

Use of numerical weather prediction (NWP) models at high resolution (3.3km) permits more realistic depiction of the wind field compared to coarser NWP simulations (~10-30km) and both regional and global reanalysis products (~30-75km). This more realistic simulation is in part because of improved spatial representation of the underlying topography and land use. The model representation of hills and valleys, and coastlines, is also sharper than in other sources of meteorological fields. The magnitudes of extreme wind events associated with transient extratropical cyclones in the region, as well as flow through and over mountain ranges, is also much improved. Downslope windstorms that are absent in coarser-scale model grids are now resolved. The reviewer is referred to Henderson et al. (2015), which documented the WRF-STILT model configuration for high-latitude transport modeling during the NASA Carbon in Arctic Reservoirs Vulnerability Experiment (CARVE) campaign. They evaluated the polar WRF for May-Oct 2012 for v3.4.1 and v3.5.1 and Mar-Nov 2013 for v3.5.1 against surface observations of air temperature and wind speed and found good agreement. Barrow is one of the focal points for validation in this study. They also found that the WRF-STILT transport framework identifies the top of the column enhancement to within 500m of the value identified by aircraft in 67% of the profiles used by Chang et al. (2014). WRF-STILT can capture the shape and approximate depth of the CH<sub>4</sub> enhancement throughout the column in that study. Miller et al.

(2016) states that the systematic uncertainty of the calculated surface influence from WRF-STILT is estimated at 10–20%.

However, Zona et al. (2016) note that WRF estimates of PBL ventilation rates are difficult to assess quantitatively and might be subject to particular bias in the fall (and winter), when heat fluxes are low. Additionally, the surface evaluation by Henderson et al. (2015) found the largest biases along the coast of the North Slope. We agree and acknowledge that small biases exist at different times and locations, especially during the transition seasons along the coast, but their influence is hard to quantify. Evaluation of transport errors in this region, especially in the presence of snow cover, requires future study. The discrepancies we see between observed and simulated  $\Delta\text{CO}_2$  at BRW are supported by multiple years of data, and any errors in the transport does not discount the large differences between the cold season  $\text{CO}_2$  flux models evaluated here, as errors are applied equally to all models.

The WRF-STILT description in Sect. 2.3 now reads as follows:

“The footprints are generated by the Lagrangian atmospheric transport modeling system, WRF-STILT (Stochastic Time-Inverted Lagrangian Transport model driven by Weather Research and Forecasting model meteorology (Henderson et al., 2015)). In this system, WRF meteorological fields are first generated for the study region and time period (v3.5.1 for ARM-ACME V and NOAA BRW tower footprints used here, v3.9.1 for ABoVE Arctic-CAP footprints). STILT then uses the WRF meteorology to estimate the contribution of surface fluxes to the atmospheric concentration at a specified time and place, called a receptor, by calculating the amount of time air (represented by a distribution of particles) spends in the lower half of the boundary layer at a given location. The WRF-STILT model configurations from Henderson et al. (2015) have been used extensively in numerous previous papers to study greenhouse gas fluxes using observations from aircraft and towers in Alaska, including on the North Slope (e.g., Chang et al., 2014; Miller et al., 2016; Zona et al., 2016; Commene et al., 2017; Karion et al., 2015; Hartery et al., 2018). An evaluation by Henderson et al. (2015) for WRF v.3.4.1 and v3.5.1 showed that their polar WRF configuration performs well against surface observations of air temperature and wind speed in Alaska and that WRF-STILT can capture the shape and approximate depth of greenhouse gases in the column. Zona et al. (2016) note that WRF planetary boundary layer ventilation rates may be biased in the fall (and winter) when heat fluxes are low, but this error is difficult to assess quantitatively. For this study, we use receptors set to correspond with the tower and aircraft  $\text{CO}_2$  concentration observations. The footprints (and their corresponding measurements) for these receptors sample air from throughout the North Slope but are concentrated more heavily toward the area around the NOAA BRW tower (Fig. 1c).”

Potential errors in the transport model are now mentioned in Sect. 4.3.2 as a source of uncertainty in need of further study as follows:

“Using these atmospheric observations is uncertain, however, due to potential errors in the transport modeling, which are difficult to quantify. Atmospheric modeling of remote areas such as the Alaska North Slope requires further evaluation and improvement.”



5. WRF model set up. There is no mention about details of the WRF model setup used to derive the atmospheric transport and surface sensitivity footprints applied in this study. What is the horizontal and vertical resolution of the WRF model used? What version is applied? How many spatial domains were used in the simulations? What physics options (e.g., schemes for long- and short-wave radiation, microphysics, convection, PBL, land surface, etc.) were selected for the model simulations? The differences in WRF setups can directly impact the accuracy of the model predictions.

The WRF configuration used in this study was initially extensively described and evaluated in Henderson et al. (2015) for v3.4.1 and v3.5.1. Those versions were used extensively in numerous previous papers to study greenhouse gas fluxes from aircraft and towers in Alaska, including on the North Slope (e.g., Chang et al. (2014), Miller et al. (2016), Karion et al. (2016), Hartery et al. (2016), Zona et al. (2016), Commane et al. (2017)). This paper uses both WRF v3.5.1 and a recent update to v3.9.1 as mentioned on lines 174-175 of the main text.

See response to 4 above for changes made to WRF-STILT description.

6. Line 399-410. Beyond the fact that it improves the comparison of simulated  $\Delta\text{CO}_2$  values to observations at BRW, why is the constant  $0.25 \mu\text{mol m}^{-2} \text{s}^{-1}$  zero-curtain emission source applied for October, which decreases to zero in December, chosen to add to TVPRM constrained estimates? Are there any past studies which could justify adding this value? Some justification needs to be provided for why these zero-curtain emission values were chosen.

As stated in the main text on line 402, the chosen zero-curtain flux value is within the observed variability of the IVO and CMDL sites during the early cold season and its reduction into December is consistent with these observations. This is a simplistic approximation that is meant to demonstrate the importance of adding this missing flux variability.

Clarification related to this point is incorporated below.

Also, more detail is needed to why the coastal tundra ecosystem parameterization was applied for inland aquatic fluxes. What inland water map was used to derive the location of all inland water bodies? Is lake ice phenology considered when estimating inland aquatic fluxes? How much  $\text{CO}_2$  is estimated to be emitted, or absorbed, by lakes throughout the year using these methods? In reality, lakes will have very little open water interaction with the atmosphere in the cold season as they can be frozen in this region.

The inland water map is determined from the ABoVE LC map, as initially described in Supplement. Again, the use of coastal tundra fluxes for the inland aquatic areas is a simplistic approximation that is meant to demonstrate the importance of adding this missing flux. We do not mean to imply that all inland water responds as coastal tundra, but rather that portions of inland water areas (the edges) are more similar to tundra (non-zero flux) than using a zero-flux assumption for all water. Ice phenology is not considered, but it may be similar to that of the freeze-thaw behavior soils of the coastal tundra.

This section is revised to read as follows:

“To account for these processes, we first add an additional CO<sub>2</sub> flux with zero-curtain timing to our constrained CO<sub>2</sub> flux (TVPRM) member from both inland and coastal tundra areas that consists of 0.25 μmol m<sup>-2</sup> s<sup>-1</sup> for October with a reduction to zero by the end of December. This peak additional CO<sub>2</sub> flux is within the daily variability of the observed CO<sub>2</sub> flux at the IVO and CMDL eddy flux sites during the zero-curtain period (Fig. S9) and the reduction into December is consistent with these observations. The additional zero-curtain flux improves the ability of the model to reproduce the observed ΔCO<sub>2</sub> at the NOAA BRW tower (slope = 0.46, R<sup>2</sup> = 0.41). We also apply the coastal tundra site ecosystem parameterization used in our constrained TVPRM member to all areas of inland water on the North Slope, which account for 4% of the domain according to the ABoVE LC map (Fig. S5) and were previously set to zero CO<sub>2</sub> flux. Representing these aquatic areas with biogenic CO<sub>2</sub> fluxes consistent with coastal tundra ecosystems is one simple way to bridge the terrestrial-aquatic gap in tundra ecosystem models, where portions of aquatic systems on the land-water gradient (i.e., the edges) may be more likely to respond to the environment as coastal tundra than with the zero-flux assumed by water area. The ice phenology for areas of inland water producing CO<sub>2</sub> flux is then considered to be similar to that of the freeze-thaw timing in coastal tundra soils. Adding these coastal tundra fluxes to inland water areas also improves the performance of our model (slope = 0.32, R<sup>2</sup> = 0.30 against NOAA BRW tower observations). The magnitude of additional zero-curtain flux suggested here and the portion of inland water represented with coastal tundra site parameterizations produce the best statistical comparison for a range of choices tested (Fig. S17).”

We also clarify in the discussion in Sect. 4.2:

“The simplistic approximations suggested here are not inconsistent with the existing uncertainties in tundra CO<sub>2</sub> flux modeling and demonstrate the importance of considering these additional CO<sub>2</sub> fluxes and their mechanisms for future study.”

7. Line 444-446. Net Annual CO<sub>2</sub> flux. The largest annual uptake of CO<sub>2</sub> between 2012 and 2017 was during 2013 and 2015. What was different about these years compared to the others in this time period? Is there a strong correlation with soil/air temperature, precipitation, snowpack, etc.? How about wildfires? From first glance it appears that these two years had the most acreage burned by fires in Alaska during the time period studied here (<https://uaf-iarc.org/alaskas-changingwildfire-environment/>). The text describes that the balance of R<sub>soil</sub>, R<sub>plant</sub>, and GPP control the overall biospheric CO<sub>2</sub> flux; however, some description of the controlling variables on interannual variability of net CO<sub>2</sub> flux in this region would improve the scientific impact of this study.

On the annual timescale, 2013 and 2015 were stronger net sinks and 2014 was the strongest net source. The growing season (May-Aug) timeframe in each year determines the net sign as the cold season (Sep-Apr) net CO<sub>2</sub> flux is relatively constant from year to year.

The summer of 2015 was very warm, dry, and sunny in Alaska and resulted in extreme biomass burning activity outside of the North Slope (see response to 2 above). According to our best TVPRM simulation with additional CO<sub>2</sub> fluxes, the North Slope growing season net uptake in 2015 is very strong. This strength is due to high T<sub>a</sub>, PAR, and SIF resulting in very high GPP.

Fairly high  $T_a$  and  $T_s$  also result in high  $R_{soil}$  and  $R_{plant}$ , respectively, but this is not enough to offset the very high GEE.

In contrast, the summer of 2014 was cool, wet, and cloudy, and the simulated North Slope growing season net uptake is very weak.  $T_a$ , PAR, and SIF, all drivers of GPP, are very low. Lower-than-normal  $T_a$  also results in very low  $R_{plant}$ , but as with 2015, this is not enough to offset the extremely low uptake.

Growing season 2013 maintains moderately high GPP, but with moderately low  $R_{plant}$  and very low  $R_{soil}$ . Extremely low  $T_s$  contributed to the very low  $R_{soil}$ , likely as a result of above-average lingering snowpack into May. This is a bit surprising given that the mean snowpack for the proceeding cold season (Sep-Apr) was not particularly deep. This result supports the importance of snowmelt timing for net carbon exchange.

Discussion of the drivers of interannual variability in growing season fluxes has been added to Sect 4.1 in response to this comment and the comments of Reviewer 2 as follows:

“The growing season of each year determines the sign of the regional annual net  $CO_2$  flux during our study period, with 2013 and 2015 being strong net sinks and 2014 being the strongest net source. The relative magnitude of each component of the net  $CO_2$  flux during the growing season (i.e.,  $R_{soil}$ ,  $R_{plant}$ , GPP) varies from year-to-year (Table S7) and helps explain the interannual variability in the net source or sink status of the North Slope. Growing season 2015 was very warm, dry, and sunny in Alaska and resulted in extreme biomass burning activity outside of the North Slope (Table S1). High regional mean  $T_a$  and PAR (Table S8) and low accumulated precipitation (Table S9) in NARR confirm this was the case for North Slope as well, with high  $T_a$  and PAR contributing to a very high GPP. The growing season SIF signal from the CSIF product, which determines the seasonal cycle and relative magnitude of photosynthetic activity, is also large in 2015 (Table S8), further enhancing GPP. This year and others with a larger GPP component of NEE correspond to growing seasons with stronger SIF signals, which is an indicator of increased productivity and consistent with previous studies (e.g., Magney et al., 2019; Sun et al., 2017). While fairly high  $T_a$  and  $T_s$  in 2015 also result in high  $R_{soil}$  and  $R_{plant}$ , respectively, this elevated respiration is not enough to offset the very high GPP and results in a large net  $CO_2$  sink. In contrast, the summer of 2014 was cool, wet, and cloudy, and the North Slope experienced very low  $T_a$ , PAR, and SIF signal, producing very low GPP. Lower-than-normal  $T_a$  also results in very low  $R_{plant}$ , but as with 2015, this is not enough to offset the extremely low uptake resulting in a large net  $CO_2$  source for 2014. In 2013, the other growing season with a strong net  $CO_2$  sink, moderately high GPP combines with moderately low  $R_{plant}$  and very low  $R_{soil}$ . Extremely low  $T_s$  causes this very low  $R_{soil}$ , which, relative to moderate  $T_a$  and PAR, is likely a result of above-average lingering snowpack into May (Table S9). This lingering snowpack is perhaps surprising given that the mean snowpack for the proceeding cold season was not particularly deep. The important impact that snow cover and the timing of snowmelt has on  $T_s$  and carbon response in tundra ecosystems has been recently emphasized (e.g., Kim et al., 2021), and is supported by our work, which shows that the prevalence of snow in the spring may determine the sign of the regional net  $CO_2$  for an entire year.”

The following were added to the Supplement as Tables S7-S9:

Table S7. Alaska North Slope growing season (May–Aug) net CO<sub>2</sub> flux by component for the TVPRM Constrained + ZC and IW scenario for 2012–2017.

| Flux Component           | 2012 | 2013 | 2014 | 2015 | 2016 | 2017 |
|--------------------------|------|------|------|------|------|------|
| R <sub>soil</sub> [TgC]  | 18   | 16   | 17   | 18   | 18   | 17   |
| R <sub>plant</sub> [TgC] | 33   | 30   | 28   | 33   | 33   | 30   |
| GPP [TgC]                | 69   | 71   | 60   | 77   | 71   | 68   |
| NEE [TgC]                | -18  | -25  | -15  | -25  | -19  | -21  |

Table S8. Alaska North Slope growing season (May-Aug) mean TVPRM drivers used in the TVPRM Constrained + ZC and IW scenario for 2012–2017, where the mean uses model gridboxes where the total ABoVE LC ocean and other land fraction is less than 0.5 (see Fig. S5).

| Driver                                                                      | 2012 | 2013 | 2014 | 2015 | 2016 | 2017 |
|-----------------------------------------------------------------------------|------|------|------|------|------|------|
| NARR T <sub>a</sub> [°C]                                                    | 7.4  | 6.6  | 6.2  | 7.5  | 7.8  | 6.8  |
| NARR T <sub>scale</sub>                                                     | 0.67 | 0.61 | 0.58 | 0.65 | 0.65 | 0.58 |
| NARR T <sub>s</sub> [°C]                                                    | 2.6  | 0.68 | 1.3  | 2.4  | 2.7  | 1.5  |
| NARR PAR<br>[μmol photon m <sup>-2</sup> s <sup>-1</sup> ]                  | 484  | 478  | 466  | 495  | 497  | 507  |
| CSIF SIF product<br>[mW m <sup>-2</sup> nm <sup>-1</sup> sr <sup>-1</sup> ] | 0.17 | 0.18 | 0.16 | 0.19 | 0.18 | 0.18 |

Table S9. Alaska North Slope growing season (May-Aug) mean additional select NARR Variables for 2012–2017, where the mean uses model gridboxes where the total ABoVE LC ocean and other land fraction is less than 0.5 (see Fig. S5).

| Variable                                                       | 2012  | 2013  | 2014  | 2015  | 2016  | 2017  |
|----------------------------------------------------------------|-------|-------|-------|-------|-------|-------|
| NARR 3hr accum.<br>precipitation [kg m <sup>-2</sup> ]         | 0.19  | 0.21  | 0.20  | 0.15  | 0.16  | 0.16  |
| NARR soil moisture<br>content [kg m <sup>-2</sup> ]            | 688   | 745   | 755   | 747   | 733   | 734   |
| NARR snow depth<br>[m]                                         | 0.046 | 0.076 | 0.032 | 0.030 | 0.026 | 0.040 |
| NARR snow cover<br>fraction [0-1]                              | 0.15  | 0.20  | 0.16  | 0.12  | 0.11  | 0.17  |
| NARR snow depth<br>[m] during<br>proceeding Sep-Apr            | 0.42  | 0.35  | 0.36  | 0.38  | 0.35  | 0.38  |
| NARR snow cover<br>fraction [0-1] during<br>proceeding Sep-Apr | 0.81  | 0.78  | 0.79  | 0.83  | 0.87  | 0.78  |

8. What are the scientific advancements of this study? The work does a nice job of combining in situ and remote-sensing data and models to estimate the annual net CO<sub>2</sub> flux from the North Slope of Alaska. However, beyond the detailed description of how the TVPRM estimates were optimized to match atmospheric observations, what is the importance of the TVPRM model development? A near neutral net annual CO<sub>2</sub> flux for the North Slope is derived with TVPRM which is said to be consistent with past model ensemble estimates (Fisher et al., 2014), so this result is really only novel compared to some past estimates from Luus et al. (2017), Natali et al. (2019), and Watts et al. (2021) discussed in the text. An interesting finding is the TVPRM prediction of interannual variability of CO<sub>2</sub> fluxes in the region. The fact that the model suggested the net annual CO<sub>2</sub> flux changes between small sources and sinks is interesting. The study states that variability in uptake season strength drives this variability; however, what are the physiochemical variables driving these differences? Is it precipitation, snowpack, air/soil temperature, fires, etc.? There is a lot that could be studied here to improve the novel aspects of the work. Looking into these physiochemical drivers, and their control on net CO<sub>2</sub> fluxes, would really help the reader understand what controlling variables could drive future changes in this region. This was stated in the text to be an importance of this work but really isn't addressed here at all.

TVPRM is a tool to be used to explore potential relationships between observed site-level net CO<sub>2</sub> fluxes, environmental drivers, and scaling methods. The key results of the paper come from the atmospheric observations which evaluate both the TVPRM ensemble and the previous flux estimates mentioned above. When constrained to the atmospheric observations, TVPRM estimates net CO<sub>2</sub> fluxes much lower in the late cold season compared to previous estimates by Luus et al. (2017) and Natali and Watts et al (2019). Fluxes from Luus et al. (2017) and Natali and Watts et al (2019) are also shown to be much too high. The differences between these are enough to change the North Slope from a consistent net source of CO<sub>2</sub> to a variable net source and sink between years. These results are highlighted in the paper.

We have expanded the discussion of controlling variables for the interannual variability to improve importance of this work as a response to 7 above and the comments of Reviewer 2.

We have also added implications for the work and how it could be used to improve modeling studies to end of discussion in Sect. 3.4.2:

“The large initial range of potential regional net CO<sub>2</sub> flux values we found for the Alaska North Slope indicates a large sensitivity to choices and assumptions made when scaling eddy flux observations from the site- to regional- scale. The most important of these choices are the representation of the upland tundra, particularly for the response of  $R_{soil}$  to  $T_s$  during the cold season, and the distribution of vegetation types throughout the domain. Future tundra CO<sub>2</sub> modeling efforts should focus on using site-level data that is the most consistent with regional-scale fluxes, rather than incorporating data from all available sites. Consistency and accuracy in classification schemes used in vegetation maps must also be addressed. As we have shown with the atmospheric observations, not all model scenarios have equal likelihood to be true, and the mean of the model ensemble is not necessarily the most likely or most consistent with the atmosphere. Using these atmospheric observations is uncertain, however, due to potential errors in the transport modeling, which are difficult to quantify. Atmospheric modeling of remote areas such as the Alaska North Slope requires further evaluation and improvement. Further, increasing

model temporal resolution should be considered as the importance of the zero-curtain and snow cover to the net CO<sub>2</sub> flux of tundra ecosystems is recognized, both of which vary on the order of days and weeks, rather than months.”

9. Could the TVPRM model be used with future gridded predictions of meteorology, vegetation, hydrology, and other sources of information to predict future changes in the net CO<sub>2</sub> flux of the North Slope? If so, it is likely beyond this study to do so, but this should be discussed in the conclusions section of the text to increase the scientific impact of this work.

TVPRM is a relatively simple, yet accurate model for net biogenic CO<sub>2</sub> flux when tuned to present-day eddy flux data. The model could be used for future projections, however, it is not prognostic, and the flux-driver relationships in the rapidly warming Arctic ecosystems are changing so quickly that we would not assume accuracy into the future.

The following text is added near the end of Sect. 4.3:

“TVPRM could be used with projections of meteorology and SIF to calculate the future net CO<sub>2</sub> balance for this region, but we caution against overuse of the model using current parameters, as the flux-driver relationships in the rapidly warming Arctic ecosystems are changing so quickly that we would not assume accuracy into the future.”

10. Vegetation maps. A major finding in this work is that vegetation distributions and ecosystem type information is a controlling factor on the ability to accurately model CO<sub>2</sub> fluxes in this region. Are the three vegetation maps used in this study (CAVM, RasterCAVM, ABoVE LC) the only ones available for this region? If there are other vegetation maps available, why aren't they used in this study since it is very important for TVPRM CO<sub>2</sub> flux calculation accuracy? If there are no other maps of vegetation distributions and ecosystem type, how should CAVM, RasterCAVM, and ABoVE LC be improved to assist improvement in CO<sub>2</sub> flux calculation accuracy?

We are not aware of additional vegetation maps available that are both spatially explicit and represent the distribution of tundra ecosystems. The use of three maps to demonstrate the importance of vegetation map accuracy is already a key result and an element not considered by most other studies, which only use one. In Sect 4.1, we highlight the need for “...improved vegetation mapping and classification schemes...”. How this can be accomplished is the subject of additional work.

11. Could the results from TVPRM be compared to net CO<sub>2</sub> flux estimates from other terrestrial biosphere models (e.g., CASA, SiB4, Jules, Orchidee, etc.) in this region? Does TVPRM improve upon these established terrestrial biosphere models?

We looked into these comparisons, but we decided it is not appropriate or fair to compare TVPRM with the other biosphere models mentioned in their standard versions (i.e., those used in CMIP5) are at much coarser spatial resolutions and do not explicitly account for permafrost tundra biogenic activity. The CMIP5 model net CO<sub>2</sub> fluxes for this region are highly variable, and few were able to accurately capture the magnitude or seasonal cycle of the CO<sub>2</sub> flux on the North Slope. For larger scale studies, we would encourage the evaluation of those models.

## Minor Comments

1. Line 28. Not sure what “top-down” observations at atmospheric CO<sub>2</sub> are. Do the authors mean top-down emission estimates using atmospheric observations? In Sect. 2.3 I think top-down observations of CO<sub>2</sub> enhancements ( $\Delta\text{CO}_2$ ) is the correct way to use this term. This occurs at other locations throughout the manuscript. Observations of concentrations are themselves not typically classified as top-down, but enhancements and emission estimates using models and the observations are more often termed as top-down.

We thank the reviewer for suggesting this.

We have clarified the wording in the abstract and at the end of the introduction that top-down observations are of atmospheric concentration enhancements, rather than concentrations alone.

2. Line 78-9. IVO, CMDL, TVPRM, CSIF, and SIF have yet to be defined in the text.

These terms are introduced in the main text prior to the reference to Fig. 1d in Sect. 2.4. As the reviewer points out above, many of the captions are already quite long and additionally complicating this one with definitions does not seem appropriate.

3. Line 174-175. More appropriate to reference Lin et al. (2003) for WRF-STILT.

Henderson et al. (2015) is the appropriate reference for the WRF-STILT simulations used in this paper, as additionally clarified above. WRF and STILT are individually cited within that reference.

4. Figure S1. Are the multi-colored lines in each panel of Fig. S1 the “Lines for matching site parameters and locations are highlighted”? This needs to be described more clearly either in the figure caption or in the text. I had a very difficult time understanding what these lines represented.

The multi-colored lines in each panel are the results of the cross-site evaluation used to determine the site groupings for scaling from the site to regional level. In other words, in this figure, we run the model using each of the eight sets of site parameters using the meteorology and SIF inputs for each site location, for a total 64 parameter-input combinations.

We clarify the caption of Fig. S1 to read as follows:

“Timeseries of daily mean site-level net CO<sub>2</sub> flux for 2014 at eddy flux measurement sites on the Alaska North Slope (top left panel) used to determine TVPRM parameters. For the cross-site evaluation, each site panel uses the meteorology and SIF at that site to calculate the TVPRM simulated net CO<sub>2</sub> flux using the parameters determined for all sites, with the colored lines corresponding to the sites in the top left panel. Here we show TVPRM net CO<sub>2</sub> flux driven by NARR meteorology and the CSIF SIF product, where the net CO<sub>2</sub> flux for corresponding site parameters and locations are highlighted using lines with heavier weight. Black dots show observed net CO<sub>2</sub> flux at each site.” We also add references to the cross-site evaluation for clarification in Sect. 2.4 of the main text.

5. Figure S4. This figure has a lot of information in it yet is only introduced in the text. Can the authors describe the performance of the model in more detail? A couple sentences discussing intersite performance and the differences between seasons and averaging time periods would be helpful as there are very large differences which would be of interest to the reader.

This figure and the site-level evaluation of TVPRM are already described in Sect. S4 of the Supplement, which is referenced in Sect. 2.4 of the main text. The placement of the discussion is appropriate given that the site-level performance of the model is not the highlight of the paper.

We now include a brief description of the intersite performance in Sect. S4: “Intersite performance is more variable compared to the model performance trends across seasons and timescales. The relative quality of model performance at each site is likely due to the data availability for that site for a given averaging length or timeframe.”

6. Line 318-321. In Fig. 3b the reader can not distinguish between the early and late cold season as discussed in the text. Only in Fig. S11 is the temporal color scaled used.

Agreed.

Temporal color scale added in Figs. 3b–3c. Reference to Fig. 3c also added, since that panel is now similar to those referenced for comparison in Fig. S11. Figure caption edited as needed.

Revised Fig. 3:

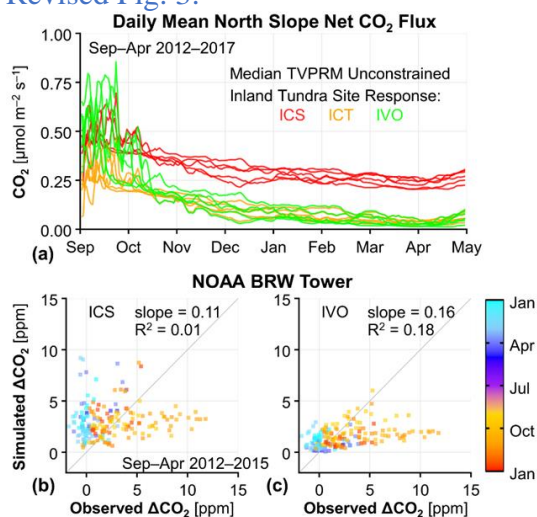

7. Fig. S14. To compare TVPRM Constrained with RS-PM Tsoil to the TVPRM Constrained using NARR data the text needs to reference which figure and sub-panel to compare Fig. S14a to.

The sentence comparing TVPRM Constrained with RS-PM Tsoil to the TVPRM Constrained using NARR now refers to Figs. 4a, S12, S14a as needed: “A single layer of T<sub>s</sub> at 8 cm depth from RS-PM (Fig. S14a) captures the magnitude and temporal behavior of the observed early cold season CO<sub>2</sub> fluxes slightly better than the constrained member (Figs. 4a, S12), which uses NARR reanalysis T<sub>s</sub> and does not incorporate permafrost-model derived T<sub>s</sub>.”



8. Line 398. Missing “the” in this sentence.

Agreed this sentence could be confusing.

Clarified to read:

“None of the flux products discussed above, including our TVPRM ensemble, account for any potential CO<sub>2</sub> fluxes during the zero-curtain period that are not driven by T<sub>s</sub> or are from areas on the terrestrial-aquatic interface.”

9. Line 56 and throughout. Why is Natali et al. (2019) referenced as Natali & Watts et al., 2019? Also, “&” and “and” are interchangeable used throughout the paper. Might be better to choose one for consistency.

Natali and Watts shared first-authorship of their paper and prefer it cited this way (personal communication).

All “&” have been changed to “and” for consistency.

10. Line 516. “motivate” instead of “motive”.

Fixed.

## References

- Fisher, J. B., Sikka, M., Oechel, W. C., Huntzinger, D. N., Melton, J. R., Koven, C. D., Ahlström, A., Arain, M. A., Baker, I., Chen, J. M., Ciais, P., Davidson, C., Dietze, M., El-Masri, B., Hayes, D., Huntingford, C., Jain, A. K., Levy, P. E., Lomas, M. R., Poulter, B., Price, D., Sahoo, A. K., Schaefer, K., Tian, H., Tomelleri, E., Verbeeck, H., Viovy, N., Wania, R., Zeng, N., and Miller, C. E.: Carbon cycle uncertainty in the Alaskan Arctic, *Biogeosciences*, 11, 4271–4288, <https://doi.org/10.5194/bg-11-4271-2014>, 2014.
- Lin, J. C., Gerbig, C., Wofsy, S. C., Andrews, A. E., Daube, B. C., Davis, K. J., and Grainger, A.: A near-field tool for simulating the upstream influence of atmospheric observations: the Stochastic Time-Inverted Lagrangian Transport Model (STILT), *J. Geophys. Res.*, 108, 4493, [doi:10.1029/2002JD003161](https://doi.org/10.1029/2002JD003161), 2003.
- Luus, K. A., Commane, R., Parazoo, N. C., Benmergui, J., Euskirchen, E. S., Frankenberg, C., Joiner, J., Lindaas, J., Miller, C. E., Oechel, W. C., Zona, D., Wofsy, S., and Lin, J. C.: Tundra photosynthesis captured by satellite-observed solar-induced chlorophyll fluorescence, *Geophys. Res. Lett.*, 44, 2016GL070842, <https://doi.org/10.1002/2016GL070842>, 2017.
- Natali, S. M., Watts, J. D., Rogers, B. M., Potter, S., Ludwig, S. M., Selbmann, et al.: Large loss of CO<sub>2</sub> in winter observed across the northern permafrost region, *Nat. Clim. Change*, 9, 852–857, <https://doi.org/10.1038/s41558-019-0592-8>, 2019.

Watts, J. D., Natali, S. M., Minions, C., Risk, D., Arndt, K., Zona, D., Euskirchen, E. S., Rocha, A. V., Sonnentag, O., Helbig, M., Kalhori, A., Oechel, W., Ikawa, H., Ueyama, M., Suzuki, R., Kobayashi, H., Celis, G., Schuur, E. A. G., Humphreys, E., Kim, Y., Lee, B.-Y., Goetz, S., Madani, N., Schiferl, L. D., Commene, R., Kimball, J. S., Liu, Z., Torn, M. S., Potter, S., Wang, J. A., Jorgenson, M. T., Xiao, J., Li, X., and Edgar, C.: Soil respiration strongly offsets carbon uptake in Alaska and Northwest Canada, *Environ. Res. Lett.*, 16, 084051, <https://doi.org/10.1088/1748-9326/ac1222>, 2021.

### Response References

Chang, R. Y.-W., Miller, C. E., Dinardo, S. J., Karion, A., Sweeney, C., Daube, B. C., Henderson, J. M., Mountain, M. E., Eluszkiewicz, J., Miller, J. B., Bruhwiler, L. M. P., and Wofsy, S. C.: Methane emissions from Alaska in 2012 from CARVE airborne observations, *PNAS*, 111, 16694–16699, <https://doi.org/10.1073/pnas.1412953111>, 2014.

Commene, R., Lindaas, J., Benmergui, J., Luus, K. A., Chang, R. Y.-W., Daube, B. C., Euskirchen, E. S., Henderson, J. M., Karion, A., Miller, J. B., Miller, S. M., Parazoo, N. C., Randerson, J. T., Sweeney, C., Tans, P., Thoning, K., Veraverbeke, S., Miller, C. E., and Wofsy, S. C.: Carbon dioxide sources from Alaska driven by increasing early winter respiration from Arctic tundra, *PNAS*, 114, 5361–5366, <https://doi.org/10.1073/pnas.1618567114>, 2017.

Hartery, S., Commene, R., Lindaas, J., Sweeney, C., Henderson, J., Mountain, M., Steiner, N., McDonald, K., Dinardo, S. J., Miller, C. E., Wofsy, S. C., and Chang, R. Y.-W.: Estimating regional-scale methane flux and budgets using CARVE aircraft measurements over Alaska, *Atmospheric Chemistry and Physics*, 18, 185–202, <https://doi.org/10.5194/acp-18-185-2018>, 2018.

Henderson, J. M., Eluszkiewicz, J., Mountain, M. E., Nehrkorn, T., Chang, R. Y.-W., Karion, A., Miller, J. B., Sweeney, C., Steiner, N., Wofsy, S. C., and Miller, C. E.: Atmospheric transport simulations in support of the Carbon in Arctic Reservoirs Vulnerability Experiment (CARVE), *Atmos. Chem. Phys.*, 15, 4093–4116, <https://doi.org/10.5194/acp-15-4093-2015>, 2015.

Karion, A., Sweeney, C., Kort, E. A., Shepson, P. B., Brewer, A., Cambaliza, M., Conley, S. A., Davis, K., Deng, A., Hardesty, M., Herndon, S. C., Lauvaux, T., Lavoie, T., Lyon, D., Newberger, T., Pétron, G., Rella, C., Smith, M., Wolter, S., Yacovitch, T. I., and Tans, P.: Aircraft-Based Estimate of Total Methane Emissions from the Barnett Shale Region, *Environ. Sci. Technol.*, 49, 8124–8131, <https://doi.org/10.1021/acs.est.5b00217>, 2015.

Kim, J., Kim, Y., Zona, D., Oechel, W., Park, S.-J., Lee, B.-Y., Yi, Y., Erb, A., and Schaaf, C. L.: Carbon response of tundra ecosystems to advancing greenup and snowmelt in Alaska, *Nat Commun*, 12, 6879, <https://doi.org/10.1038/s41467-021-26876-7>, 2021.

Magney, T. S., Bowling, D. R., Logan, B. A., Grossmann, K., Stutz, J., Blanken, P. D., Burns, S. P., Cheng, R., Garcia, M. A., Köhler, P., Lopez, S., Parazoo, N. C., Raczka, B., Schimel, D., and Frankenberg, C.: Mechanistic evidence for tracking the seasonality of photosynthesis

with solar-induced fluorescence, *Proceedings of the National Academy of Sciences*, 116, 11640–11645, <https://doi.org/10.1073/pnas.1900278116>, 2019.

Miller, S. M., Miller, C. E., Commane, R., Chang, R. Y.-W., Dinardo, S. J., Henderson, J. M., Karion, A., Lindaas, J., Melton, J. R., Miller, J. B., Sweeney, C., Wofsy, S. C., and Michalak, A. M.: A multiyear estimate of methane fluxes in Alaska from CARVE atmospheric observations, *Global Biogeochem. Cycles*, 30, 1441–1453, <https://doi.org/10.1002/2016GB005419>, 2016.

Sun, Y., Frankenberg, C., Wood, J. D., Schimel, D. S., Jung, M., Guanter, L., Drewry, D. T., Verma, M., Porcar-Castell, A., Griffis, T. J., Gu, L., Magney, T. S., Köhler, P., Evans, B., and Yuen, K.: OCO-2 advances photosynthesis observation from space via solar-induced chlorophyll fluorescence, *Science*, 358, eaam5747, <https://doi.org/10.1126/science.aam5747>, 2017.

Zona, D., Gioli, B., Commane, R., Lindaas, J., Wofsy, S. C., Miller, C. E., Dinardo, S. J., Dengel, S., Sweeney, C., Karion, A., Chang, R. Y.-W., Henderson, J. M., Murphy, P. C., Goodrich, J. P., Moreaux, V., Liljedahl, A., Watts, J. D., Kimball, J. S., Lipson, D. A., and Oechel, W. C.: Cold season emissions dominate the Arctic tundra methane budget, *PNAS*, 113, 40–45, <https://doi.org/10.1073/pnas.1516017113>, 2016.
